# Supplementary material for: Predictive Value of Cardiac Magnetic Resonance for Left Ventricular Remodeling of Patients with Acute Anterior Myocardial Infarction
Source: MDPI journal article supplement (doi:10.3390/diagnostics12112780), 2022-11-14
Supplement: s1 [file s1]

**Supplementary Table S1.** Intraclass correlation coefficient of CMR strain analysis.

| CMR Strain Indexes             | Intra-Observer     | Inter-Observer     |
|--------------------------------|--------------------|--------------------|
| GLS, %                         | 0.972(0.890,0.993) | 0.944(0.803,0.986) |
| GCS, %                         | 0.916(0.676,0.979) | 0.919(0.690,0.980) |
| GRS, %                         | 0.896(0.615,0.974) | 0.881(0.490,0.997) |
| Peak CS <sub>infarct</sub> , % | 0.939(0.783,0.984) | 0.908(0.678,0.976) |
| Peak CS <sub>remote</sub> , %  | 0.972(0.894,0.993) | 0.892(0.631,0.972) |
| Peak RS <sub>infarct</sub> , % | 0.887(0.620,0.970) | 0.911(0.515,0.980) |
| Peak RS <sub>remote</sub> , %  | 0.943(0.480,0.988) | 0.930(0.401,0.986) |

CMR, cardiovascular magnetic resonance; GLS, global longitudinal strain; GCS, global circumferential strain; GRS, global radial strain; CS<sub>infarct</sub>, circumferential strain in infarcted segments; CS<sub>remote</sub>, circumferential strain in remote non-infarcted segments; RS<sub>infarct</sub>, radial strain in infarcted segments; RS<sub>remote</sub>, radial strain in remote non-infarcted segments.

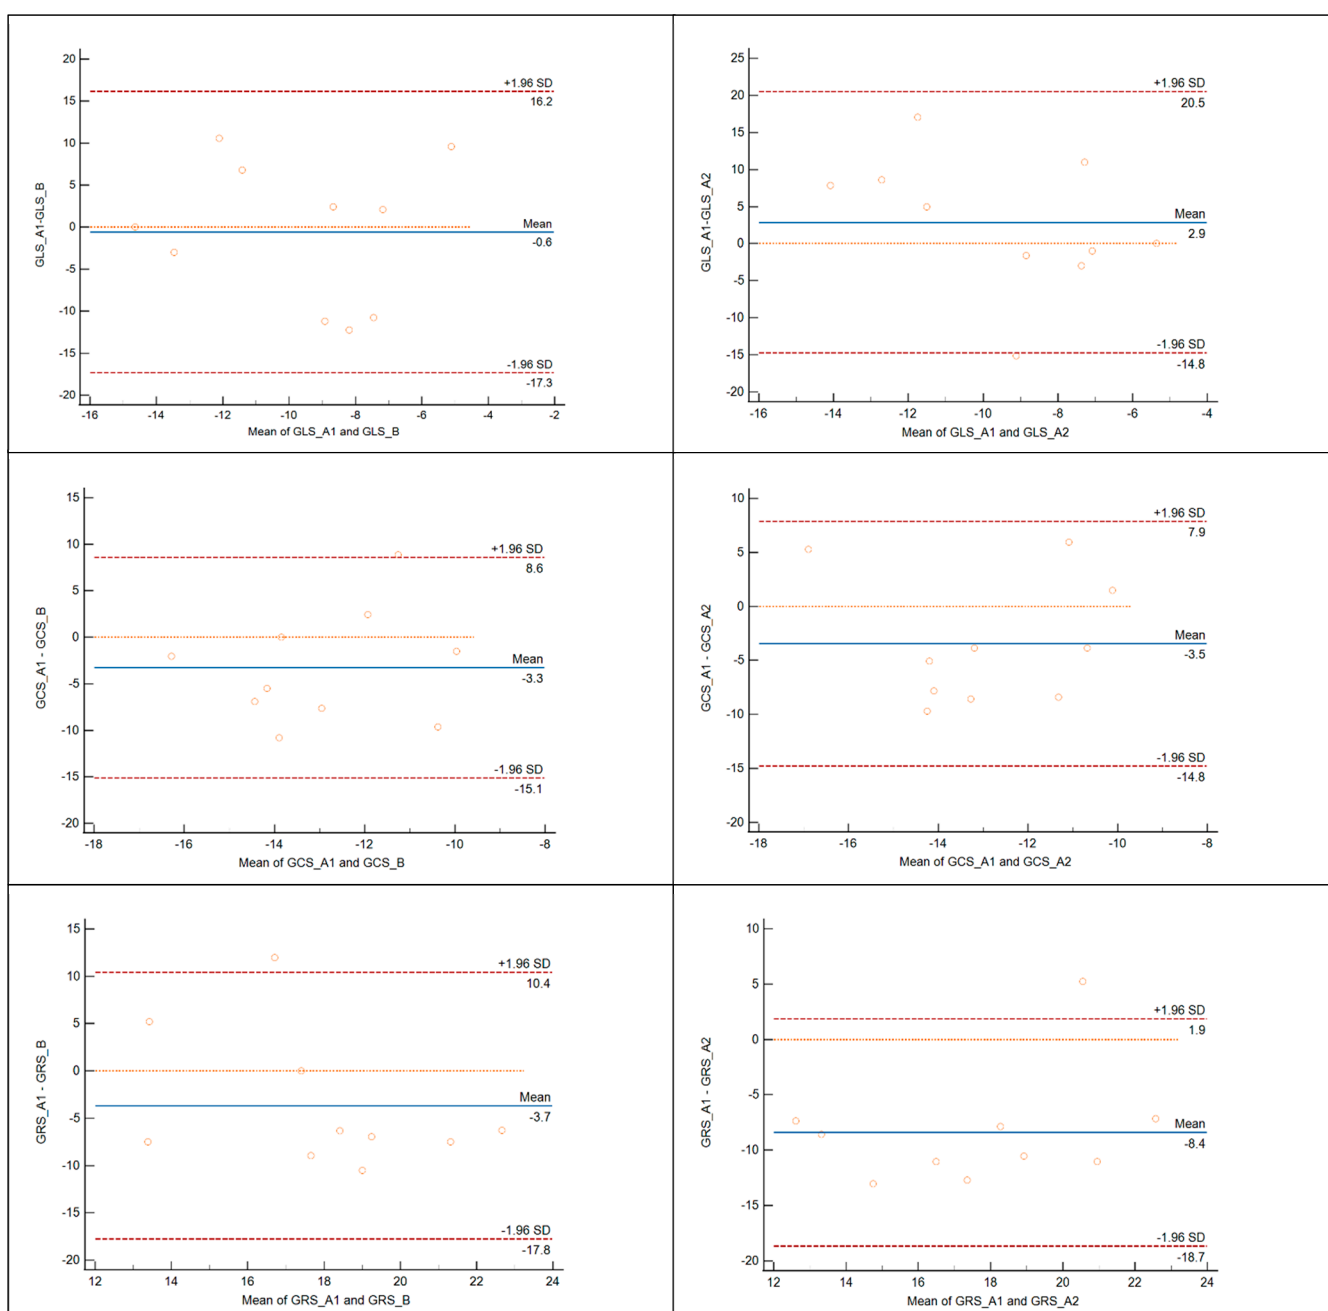

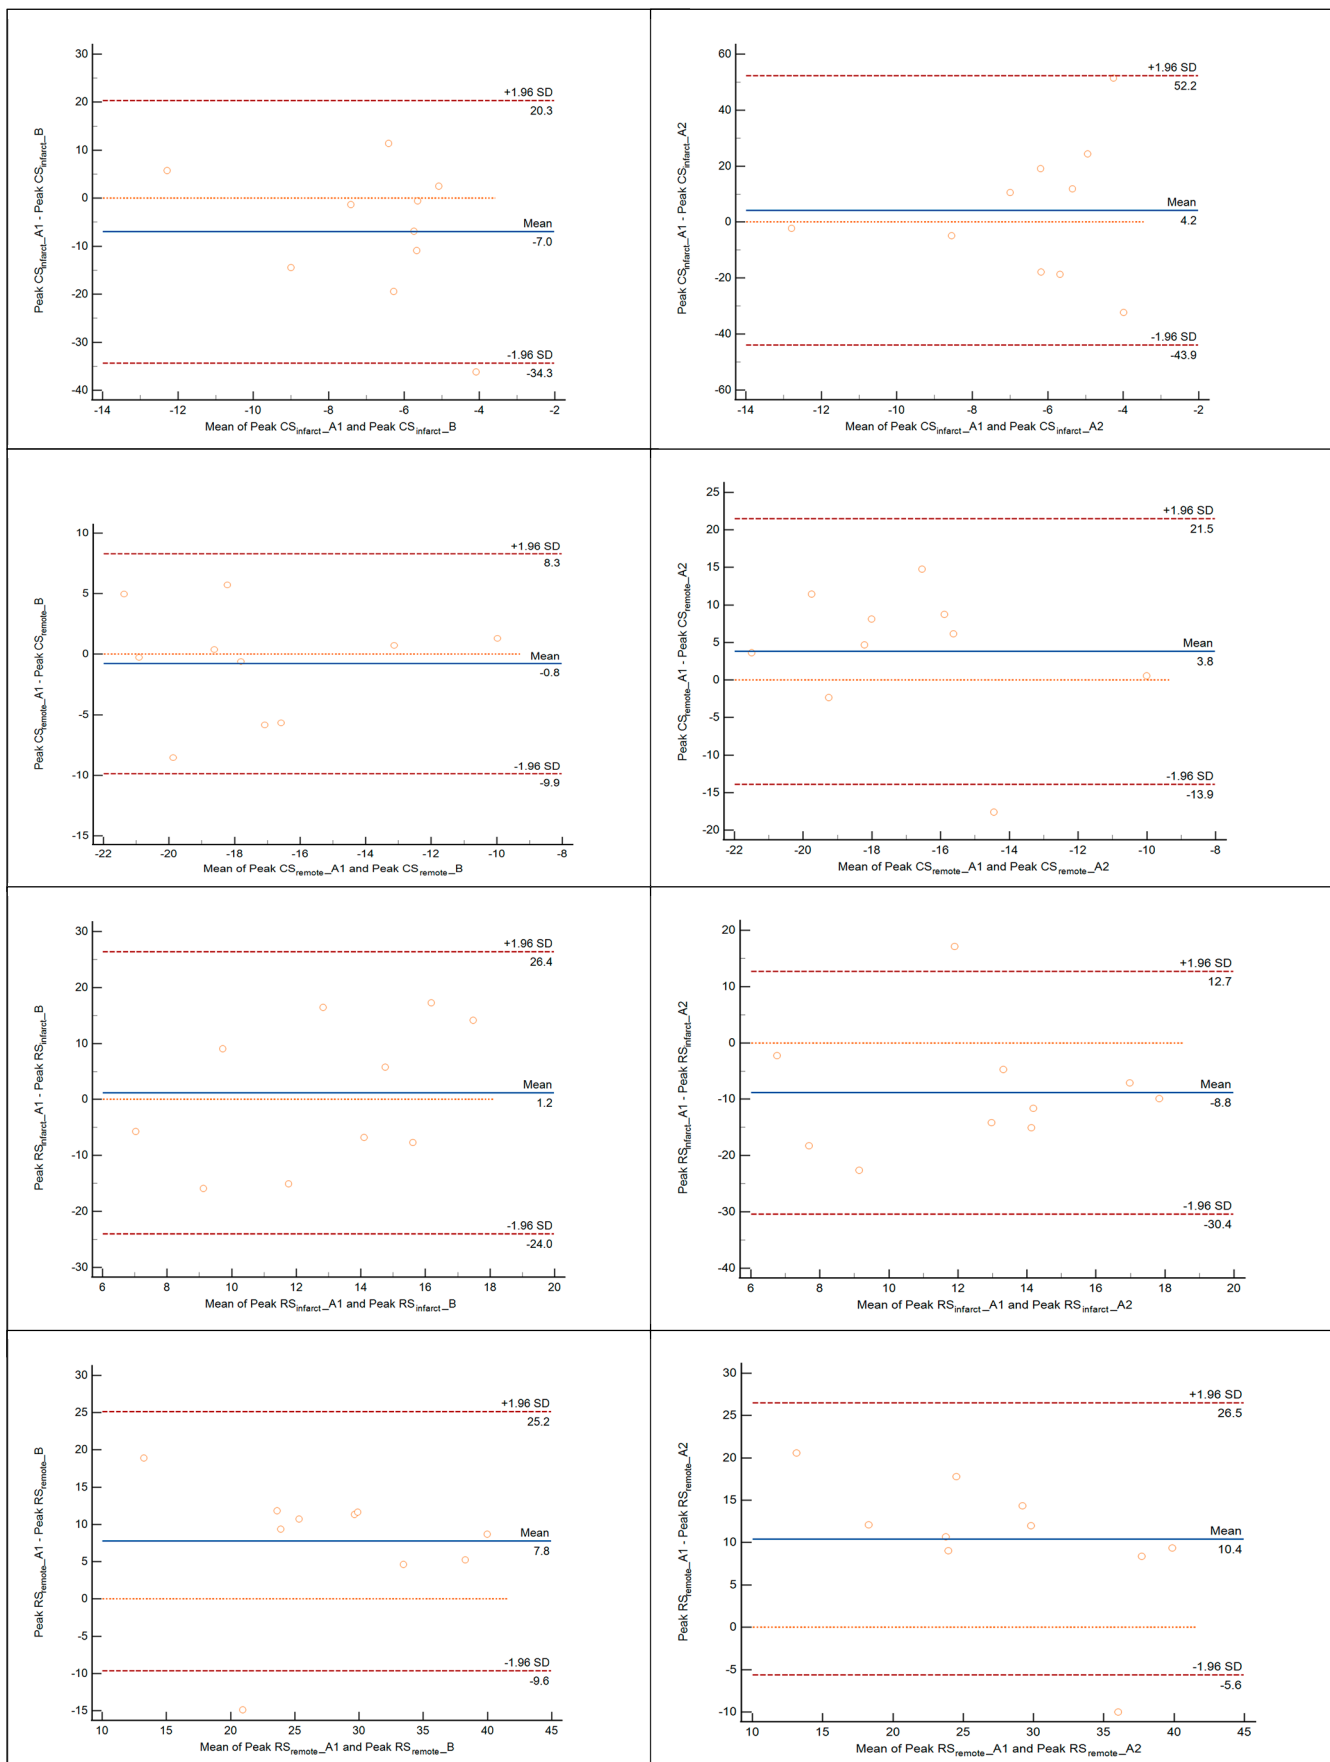

Supplementary Figure S1. Bland-Altman analysis of LV strain indexes.

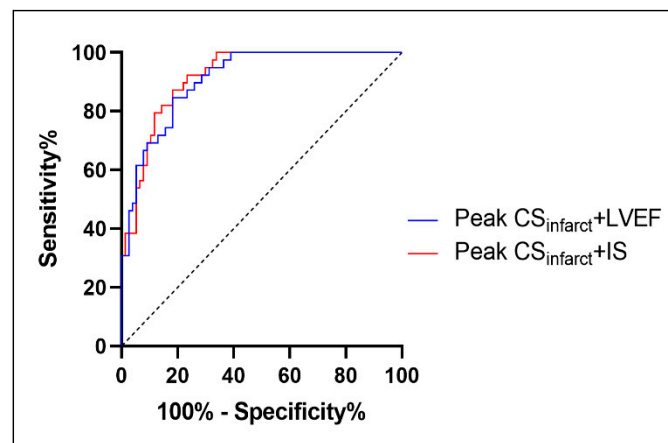

**Supplementary Figure S2.** Receiver operating characteristic analysis for predication of LVR after PPCI.  $CS_{\text{infarct}}$  + IS had similar the area under the ROC with  $CS_{\text{infarct}}$  + LVEF (0.909, 95% CI: 0.858–0.959  $p < 0.001$  vs 0.917, 95%CI:0.870–0.965,  $p < 0.001$ ), LVR, left ventricular remodeling; PPCI, primary percutaneous coronary intervention;  $CS_{\text{infarct}}$ , circumferential strain in infarcted segments; IS, infarct size; ROC, receiver operating characteristic; LVEF, left ventricular ejection fraction.
